# Supplementary figures and images for: Pulse Oximetry and Race in Critically Ill Adults
Source: PubMed Central journal article supplement — Crit Care Explor. 2022 Sep 14;4(9):e0758. doi: 10.1097/CCE.0000000000000758 (PMC9478292; doi:10.1097/cce.0000000000000758), 2022-09-14

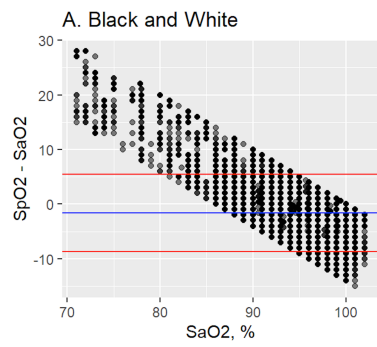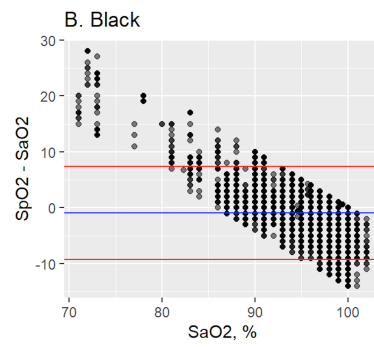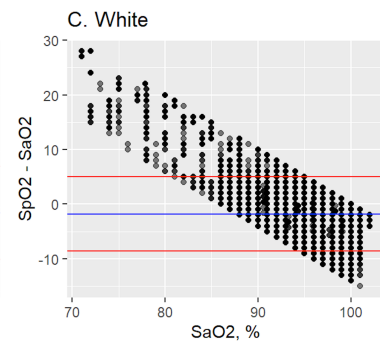

Supplement: cc9-4-e0758-s001.pdf [file cc9-4-e0758-s001.pdf]
